# Supplementary material
Source: PubMed Central journal article supplement (PMC3402550)
Supplement: supp_185.3.267_Sutcliffe_ODS.pdf [file supp_185.3.267_Sutcliffe_ODS.pdf]

**Supplementary Material**

**NOX4 over-expression mediates intrinsic airway smooth muscle hyper-contraction in asthma**

A Sutcliffe<sup>1\*</sup>, F Hollins<sup>1\*</sup>, E Gomez<sup>1,2\*</sup>, R Saunders<sup>1</sup>, C Doe<sup>1</sup>, M Cooke<sup>3</sup>, RAJ Challiss<sup>2</sup>, CE Brightling<sup>1</sup>

<sup>1</sup>Institute for Lung Health, Department of Infection, Immunity & Inflammation, University of Leicester, UK

<sup>2</sup>Department of Cell Physiology and Pharmacology, University of Leicester, UK

<sup>3</sup>Oxidative Stress Group, Department of Cancer Studies, & Dept. Genetics, University of Leicester, UK

\*Equal contribution

Address for correspondence:

Professor CE Brightling

Institute for Lung Health

Clinical Sciences Wing

University Hospitals of Leicester

Leicester

LE3 9QP, UK

Tel: 0044 116 258 3998

Fax: 0044 116 258 3950

E-mail: [ceb17@le.ac.uk](mailto:ceb17@le.ac.uk)

## **Material and Methods**

### ***Subjects***

Asthmatic subjects and healthy controls were recruited from Leicester, UK. Asthmatic subjects had a consistent history and objective evidence of asthma. Asthma severity was defined by Global Initiative for asthma treatment steps (mild-moderate GINA 1-3, severe GINA 4-5) (2). Subjects underwent extensive clinical characterization including sputum induction and video-assisted fiberoptic bronchoscopic examination. The study was approved by the Leicestershire Ethics Committees and all patients gave their written informed consent.

### ***Cell isolation and culture***

Pure airway smooth muscle bundles were isolated from bronchoscopic samples (n=23 asthma, n=19 non-asthma) and from lung resection from subjects with normal lung function (n=6). Airway smooth muscle was cultured in DMEM with Glutamax-1 supplemented with 10% FBS, 100U/mL penicillin, 100µg/mL streptomycin, 0.25µg/mL amphotericin, 100µM non-essential amino-acids and 1mM sodium pyruvate. airway smooth muscle ASM cell characteristics were determined by immunofluorescence and light microscopy with  $\alpha$ -smooth muscle actin-FITC direct conjugate (Sigma, Gillingham, Dorset, UK) as previously described<sup>8</sup>.

### ***Immunohistochemistry***

Sequential 2µm sections were cut from glycomethacrylate embedded bronchial biopsies and stained using a monoclonal anti-human 8-oxodg antibody (Abcam, Cambridge, UK), and appropriate isotype control mouse IgG1 (DAKO, Cambridge, UK). Positive 8-oxodG staining was observed within the nuclei. 8-oxodG staining by the airway smooth muscle was

assessed using a semi-quantitative score of no staining=0, very low=1, low=2, moderate=3, high=4, and very high=5.

***SDS-Polyacrylamide Gel Electrophoresis (PAGE) and immunoblotting***

Airway smooth muscle cells from normal and asthma donors were grown to about 90% confluence. The cells were washed once with ice-cold PBS and then scraped into 1xSDS-sample buffer containing 1% SDS, 62.5mM Tris-HCl pH 6.8, 2.5%  $\beta$ -mercaptoethanol, 10% glycerol and 0.0005% bromophenol blue. The lysates were sonicated, and SDS-PAGE and western-blotting were performed as described (23). Briefly, samples were subjected to electrophoresis on SDS-polyacrylamide gels and gels were transferred to Polyvinylidene fluoride membrane (Millipore). Rabbit polyclonal anti-human SOD2 and SOD1 were purchased from Abcam and detection used horse anti-rabbit IgG HRP-conjugated secondary antibody (Cell Signaling Technology). Mouse anti-actin antibody was purchased from Santa Cruz as a HRP conjugate. Detection was by enhanced chemiluminescence (GE healthcare).

***Human 8-oxoguanine DNA glycosylase 1 (hOGG1)-modified comet assay (hOGG1 comet)***

DNA damage was assessed using the human 8-oxoguanine glycosylase 1 (hOGG1)-modified comet assay (hOGG1 comet), as previously described (24). Airway smooth muscle cells were incubated in the presence or absence of 100 $\mu$ M H<sub>2</sub>O<sub>2</sub> for 30min and then suspended in 0.6% low melting point agarose. Eighty microlitres of the agarose gel (containing approximately 2 $\times$ 10<sup>4</sup> cells) were dispensed onto glass microscope slides, coated previously with 1% normal melting point agarose. The agarose was allowed to set on ice under a coverslip and the slides left overnight in ice-cold lysis buffer (100mM disodium EDTA, 2.5M NaCl, 10mM Tris-HCl, pH 10, containing 1% triton X-100, which was added freshly). Slides were washed once with

distilled water and immersed in two changes of enzyme digestion buffer [40mM HEPES, 0.1M KCl, 0.5mM EDTA and 0.2mg/ml BSA (pH 8.0)], for 5 min each time, at room temperature. hOGG1 was added to the gel (50 $\mu$ L/gel) diluted in enzyme reaction buffer to a final concentration of 4U/mL. Gels were covered with a cover slip and incubated in a humidified chamber for 45 min at 37 °C. The cover slips were removed and the slides were placed in a horizontal electrophoresis tank, covered with cold alkaline electrophoresis buffer (300mM NaOH, 1mM disodium EDTA, pH  $\geq$  13) for 20 min and electrophoresed at 27V (0.7V/cm) and 300mA for 20 min. Slides were neutralised with 0.4M Tris-HCl, pH 7.5 for 20 min, washed with distilled water and then allowed to dry. All procedures were carried out under subdued light to minimise adventitious DNA damage. For staining, slides were re-hydrated in distilled water, incubated with a freshly made solution of 2.5 $\mu$ g/mL propidium iodide (PI) for 20 min, washed again for 30 min and allowed to dry. Comets were visualised by fluorescence microscopy at  $\times$ 200 magnification. Images were captured by an on-line CCD camera and analysed with the Perceptive Instruments Comet Assay software version IV (Perceptive Instruments, Haverhill, UK). A total of 100 cells were analysed per sample, 50 per duplicate slide. The tail moment was calculated for each cell by Perceptive Instruments Comet Assay IV software.

### ***Flow cytometry***

Confluent (80-90%) airway smooth muscle cells were growth arrested in insulin/transferrin-sodium selenite (ITS) media (ITS+3; Sigma-Aldrich, Gillingham, Dorset, UK) for 24h. Airway smooth muscle were fixed with 4% paraformaldehyde with or without saponin 0.1% for extracellular or intracellular staining; re-suspended and permeabilised in PBS/0.5% BSA with or without 0.1% saponin ( $1 \times 10^6$  cells/mL) as previously described (20). Cells were stained with antibodies to rabbit polyclonal NOX4 (Abcam, Cambridge, UK), NOX 1-3 and

5 (Insight, Biotechnology, Wembly, UK) or mouse monoclonal bradykinin B2 receptor indirectly labelled with FITC (BD) or their appropriate isotype controls indirectly labelled with fluorescein isothiocyanate (FITC; Dako), and cells were stained with  $\alpha$ -smooth muscle actin FITC direct conjugate (Sigma) or appropriate isotype control (Dako). Analysis was performed by single colour flow cytometry (FACScan, CellQuest software Becton-Dickinson, Oxford, UK) and was quantified as percentage positive compared to control.

### ***Immunofluorescence***

Cells were stained with polyclonal antibodies for NOX1-5 or SOD2 appropriate isotype controls, indirectly labeled with FITC and counterstained with 4',6'-diamidino-2 phenylindole (DAPI; Sigma).

### ***Gene array and analysis***

RNA expression levels from the airway smooth muscle were examined using the Human Genome U133A probe array (GeneChip, Affymetrix, Santa Clara, CA, USA). Hybridized biotinylated cRNA was stained with streptavidin-phycoerythrin (Molecular Probes, Eugene, OR, USA), scanned with a HP Gene Array Scanner. All Affymetrix U133 plus 2.0 GeneChip<sup>®</sup> arrays passed the quality control characteristics. Image data from each microarray were individually scaled to an intensity of 200 using GCOS (Affymetrix). Scaled average difference and absolute call data were exported to text files and used for analysis implemented by DNA Chip Analyzer (D-CHIP) to determine genes that demonstrated significant differential expression between health and disease by  $>2$ -fold up or down-regulated following 1000 permutations or were present in  $\geq 5$  asthmatic/healthy compared to  $\leq 1$  healthy/asthmatics.

***Real-Time Reverse Transcription–Polymerase Chain Reaction***

Total RNA was isolated using Peq Gold total RNA kit (Peq Lab). The concentration and purity of each sample were determined by analyzing spectrophotometric absorption at 260/280nm. Real-Time Reverse Transcription–Polymerase Chain Reaction was performed using SuperScript Vilo cDNA synthesis kit and amplification performed with Express SYBR GreenER qPCR Supermix Universal (Invitrogen). The internal normaliser gene used was 18S RNA, and was carried out with 18S forward (GTTGGTTTTTCGGAAGTGG) and 18S reverse (GCATCGTTTATGGTCGGAAC) primers, while amplification of NOX4 was carried out with NOX4 forward (TGGCTGCCCATCTGGTGAATG) and NOX4 reverse (GCATCGTTTATGGTCGGAAC) primers as previously described (25). The relative quantification was done using the comparative deltadeltact method ( $2^{-\Delta\Delta C_t}$ ) method and expressed as fold change as previously described (25).

***Assessment of airway smooth muscle contraction by Collagen Gel Analysis***

Airway smooth muscle cells were harvested either post-treatment with diphenyleneiodonium (DPI) (1, 5 $\mu$ M for 6h; Sigma) apocynin (10 $\mu$ M for 30min; ), or the SOD mimetic manganese (III) tetrakis (4-benzoic acid) porphyrin chloride (MnTBAP) (10, 50, 100 $\mu$ g/mL for 6h; Enzo Life Sciences), or post-transfection with anti NOX-4 or anti SOD-2 siRNA, and their contractile properties assessed using collagen gel contraction assay.

Collagen gels (299 $\mu$ L of collagen [Inamed Biomaterials], 37 $\mu$ L of 10 $\times$  DMEM [Invitrogen], 20 $\mu$ L of sodium bicarbonate [Invitrogen]) were impregnated with 144 $\mu$ L airway smooth muscle cells resuspended in DMEM with Glutamax-1 supplemented with penicillin (100U/mL), streptomycin (100 $\mu$ g/mL), amphotericin (0.25 $\mu$ g/mL), non-essential amino-acids (100 $\mu$ M) (Invitrogen), sodium pyruvate (1mM) and insulin-transferrin-selenium (1%)

(Sigma) at  $1.735 \times 10^6$  cells/mL, as previously described (20). 500 $\mu$ L of gel mixture was added to each well of a PBS 2% BSA pre-coated 24-well plate and allowed to polymerize at 37°C for 90min. After polymerization, 500 $\mu$ L DMEM with Glutamax-1 (supplemented as above) was added to each well and the gel was detached from the plastic surface to allow free contraction. Bradykinin was then added to each well (final concentration 1nM) in an equal volume of the above media. The collagen gels were photographed at specified time points over a 1h period and the gel size as a percentage of the well area was calculated by measuring the collagen gel area versus the well area at specific time points using ImageJ software (National Institutes of Health, USA). All gel conditions were performed in duplicate. Cell viability in the gels was mean (SEM) 87 (3)% assessed by trypan blue exclusion in cells recovered from the gels by collagenase digestion (Sigma).

***Silencing of NOX4 and SOD2 expression using siRNAs***

NOX4 and SOD2 expression were specifically silenced in airway smooth muscle cells using two 25 nucleotide prevalidated siRNA duplexes (Stealth™ Select RNAi purchased from Invitrogen) directed against human NOX4 (siRNA14: sense 5'CCUCAUGAUCACAGCCUCUACAUAU3' and antisense 5'AUAUGUAGAGGCUGUGAUGAUGAGG3' and against human SOD2 (siRNA34: sense 5'AAUCAACUGGGAGAAUGUAACUGAA3' and antisense 5'UUCAGUUACAUUCUCCCAGUUGAUU3'. A siRNA that showed no significant homology to any known protein was used as a negative control (Stealth™ RNAi negative control; Invitrogen). siRNAs were introduced into airway smooth muscle cells by nucleofection (Lonza AG, Cologne, Germany). Transfections were performed according to the manufacturer's instructions. Transfection efficiency was >90% as assessed by monitoring the transfection efficiency of fluorescent siRNA (Block-it™ Fluorescent Oligo from

Invitrogen) and knockdown of NOX4 and SOD2 gene expression was about 80-90% and 90-95% respectively as determined by qPCR.

***Intra-cellular reactive oxygen species (DCFDA assay)***

Viable cells ( $10^4$ /well) were plated into 96-well collagen, allowed to adhere overnight and serum starved for 24h. The cells were washed with PBS and incubated with  $10\mu\text{M}$  2',7'-dichlorofluorescein diacetate (DCFDA) in 5%  $\text{CO}_2$ /95% air at  $37^\circ\text{C}$  for 30min, as described previously (26). Cells were then washed and incubated with PBS or  $10\text{mM}$   $\text{H}_2\text{O}_2$ . Fluorescence was measured using a Novostar plate reader (BMG Labtech, Germany); temperature was maintained at  $37^\circ\text{C}$ , and read at excitation 485nm and emission 520nm after 1h.



**References**

- E1. Global strategy for asthma management and prevention - updated 2009 [www.ginasthma.com]. accessed May 2011
- E2. Gomez E, Powell ML, Bevington A, Herbert TP. A decrease in cellular energy status stimulates PERK-dependent eIF2alpha phosphorylation and regulates protein synthesis in pancreatic beta-cells *Biochem J.* 2008;410:485-493.
- E3. Cooke MS, Duarte TL, Cooper D, Chen J, Nandagopal S. and Evans MD. Combination of azathioprine and UVA irradiation is a major source of cellular 8-oxo-7,8-dihydro-2'-deoxyguanosine. *DNA Repair* 2008;7:1982-1989.
- E4. Touyz RM & Schiffrin EL. Ang II–Stimulated Superoxide Production Is Mediated via Phospholipase D in Human Vascular Smooth Muscle Cells. *Hypertension.* 1999; 34:976-982.
- E5. Woodman L, Siddiqui S, Cruse G, Sutcliffe A, Saunders R, Kaur D, Bradding P, Brightling C. Mast cells promote airway smooth muscle cell differentiation via autocrine up-regulation of TGF-beta 1. *J Immunol;* 2008;181:5001-5007.
- E6. Manea A, Tanase LI, Raicu M, Simionescu M. JAK/STAT Signaling Pathway Regulates Nox1 and Nox4-Based NADPH Oxidase in Human Aortic Smooth Muscle Cells *Atheroscler Thromb Vasc Biol* 2010;30:105-112.

## Figures Legends

**Figure E1** (A) Quantitative RT-PCR analysis of SOD2 mRNA in normal and asthmatic ASM cells (mean $\pm$ SEM; n=18). (B) SOD2 expression by ASM by immunofluorescence left panel rabbit IgG isotype control with 4',6-diamidino-2-phenylindole (DAPI) stained nuclei and right panel SOD2 expression in green counterstained with DAPI. (C) Representative western blots for SOD1 and 2 protein expression by ASM from asthmatics and healthy controls and (D) their intensity of expression (n=12). Between group comparisons were made by unpaired t-tests.

**Figure E2** (A) TGF- $\beta$  release by ASM from asthmatics and healthy controls over 72 h (n=15). (B) Example flow cytometric analysis of ASM  $\alpha$ -smooth muscle actin (SMA) expression basally. Grey line corresponds to IgG isotype control, black line  $\alpha$ -SMA. (C)  $\alpha$ -SMA in ASM from subjects with asthma and healthy controls (n=34). Between group comparisons were made by unpaired t-tests.

**Figure E3** (A) Example flow cytometric analysis of ASM  $\alpha$ -SMA expression following transfection with negative control siRNA or NOX4 siRNA. Grey line corresponds to IgG isotype control, black line  $\alpha$ -SMA and (B)  $\alpha$ -SMA in ASM transfected with negative control siRNA or NOX4 siRNA (n=5). (C) Example flow cytometric analysis of ASM  $\alpha$ -SMA expression following transfection with negative control siRNA or SOD2 siRNA. Grey line corresponds to IgG isotype control, black line  $\alpha$ -SMA and (D)  $\alpha$ -SMA in ASM transfected with negative control siRNA or SOD2 siRNA (n=3). Between group comparisons were made by paired t-tests.

**Table E1 Clinical characteristics of primary airway smooth muscle donors**

|                                             | Normal | Asthma  |
|---------------------------------------------|--------|---------|
| Number                                      | 19     | 23      |
| Age <sup>#</sup>                            | 49 (5) | 45 (3)  |
| Male/ Female                                | 11/8   | 12/11   |
| Never/current/ex-smokers                    | 13/0/4 | 16/1/5  |
| Atopy n (%)                                 | 8      | 50*     |
| FEV <sub>1</sub> % predicted <sup>#</sup>   | 95 (4) | 83 (5)* |
| Pre-BD FEV <sub>1</sub> /FVC % <sup>#</sup> | 79 (2) | 69 (2)* |
| BD response (%) <sup>#</sup>                | 0 (0)  | 4 (2)*  |

<sup>#</sup> mean (SEM), ^ geometric mean (95% CI), ~median (IQR), BD-bronchodilator, \*p<0.05 compared to control.

Table E2a. Genes differentially expressed in ASM cells by microarray analysis in subjects with asthma compared with healthy control subjects.  $\geq 2$  fold,  $p \leq 0.05$  with presence calls  $\geq 100\%$ . False discovery rate of 1000 permutations 29.7%.

***NOX4 mediates ASM hypercontractility***

| <i>Affymetrix ID</i> | <i>Gene Symbol</i> | <i>Gene Name</i>                                                            | <i>Entrez Gene ID</i> | <i>Fold Difference</i> | <i>P value</i> |
|----------------------|--------------------|-----------------------------------------------------------------------------|-----------------------|------------------------|----------------|
| 202016_at            | MEST               | mesoderm specific transcript homolog (mouse)                                | 4232                  | 6.72                   | 0.035          |
| 201310_s_at          | C5orf13            | chromosome 5 open reading frame 13                                          | 9315                  | 3.82                   | 0.005          |
| 201309_x_at          | C5orf13            | chromosome 5 open reading frame 13                                          | 9315                  | 3.50                   | 0.018          |
| 205047_s_at          | ASNS               | asparagine synthetase                                                       | 440                   | 3.18                   | 0.017          |
| 220892_s_at          | PSAT1              | phosphoserine aminotransferase 1                                            | 29968                 | 3.01                   | 0.031          |
| 204203_at            | CEBPG              | CCAAT/enhancer binding protein (C/EBP), gamma                               | 1054                  | 2.70                   | 0.008          |
| 200862_at            | DHCR24             | 24-dehydrocholesterol reductase                                             | 1718                  | 2.53                   | 0.004          |
| 234994_at            | KIAA1913           | KIAA1913                                                                    | 114801                | 2.53                   | 0.001          |
| 223062_s_at          | PSAT1              | phosphoserine aminotransferase 1                                            | 29968                 | 2.50                   | 0.037          |
| 202887_s_at          | DDIT4              | DNA-damage-inducible transcript 4                                           | 54541                 | 2.37                   | 0.024          |
| 217430_x_at          | COL1A1             | collagen, type I, alpha 1                                                   | 1277                  | 2.31                   | 0.044          |
| 214927_at            | ITGBL1             | integrin, beta-like 1 (with EGF-like repeat domains)                        | 9358                  | 2.21                   | 0.033          |
| 216037_x_at          | TCF7L2             | transcription factor 7-like 2 (T-cell specific, HMG-box)                    | 6934                  | 2.17                   | 0.004          |
| 224516_s_at          | CXXC5              | CXXC finger 5                                                               | 51523                 | 2.17                   | 0.049          |
| 227400_at            | NFIX               | nuclear factor I/X (CCAAT-binding transcription factor)                     | 4784                  | 2.02                   | 0.004          |
| 207071_s_at          | ACO1               | aconitase 1, soluble                                                        | 48                    | -2.01                  | 0.003          |
| 209652_s_at          | PGF                | placental growth factor, vascular endothelial growth factor-related protein | 5228                  | -2.07                  | 0.011          |
| 202422_s_at          | ACSL4              | acyl-CoA synthetase long-chain family member 4                              | 2182                  | -2.08                  | 0.020          |
| 203414_at            | MMD                | monocyte to macrophage differentiation-associated                           | 23531                 | -2.10                  | 0.011          |
| 201272_at            | AKR1B1             | aldo-keto reductase family 1, member B1 (aldose reductase)                  | 231                   | -2.18                  | 0.022          |
| 202464_s_at          | PFKFB3             | 6-phosphofructo-2-kinase/fructose-2,6-biphosphatase 3                       | 5209                  | -2.18                  | 0.040          |
| 202450_s_at          | CTSK               | cathepsin K                                                                 | 1513                  | -2.21                  | 0.005          |
| 226632_at            | CYGB               | cytoglobin                                                                  | 114757                | -2.23                  | 0.029          |
| 227705_at            | TCEAL7             | transcription elongation factor A (SII)-like 7                              | 56849                 | -2.23                  | 0.010          |
| 225532_at            | CABLES1            | Cdk5 and Abl enzyme substrate 1                                             | 91768                 | -2.26                  | 0.005          |
| 204142_at            | ENOSF1             | enolase superfamily member 1                                                | 55556                 | -2.30                  | 0.030          |
| 217739_s_at          | PBEF1              | pre-B-cell colony enhancing factor 1                                        | 10135                 | -2.30                  | 0.007          |
| 226218_at            | IL7R               | interleukin 7 receptor                                                      | 3575                  | -2.39                  | 0.035          |
| 215223_s_at          | SOD2               | superoxide dismutase 2, mitochondrial                                       | 6648                  | -2.40                  | 0.023          |
| 209631_s_at          | GPR37              | G protein-coupled receptor 37 (endothelin receptor type B-like)             | 2861                  | -2.47                  | 0.037          |
| 230869_at            | FAM155A            | family with sequence similarity 155, member A                               | 728215                | -2.68                  | 0.027          |
| 205404_at            | HSD11B1            | hydroxysteroid (11-beta) dehydrogenase 1                                    | 3290                  | -2.69                  | 0.018          |
| 203908_at            | SLC4A4             | solute carrier family 4, sodium bicarbonate cotransporter, member 4         | 8671                  | -2.92                  | 0.015          |
| 216841_s_at          | SOD2               | superoxide dismutase 2, mitochondrial                                       | 6648                  | -3.35                  | 0.001          |
| 217590_s_at          | TRPA1              | transient receptor potential cation channel, subfamily A, member 1          | 8989                  | -4.43                  | 0.018          |

Table E2b: Genes present in  $\geq 5$  asthmatic compared to  $\leq 1$  healthy controls

| <i>Affymetrix ID</i> | <i>Gene Symbol</i> | <i>Gene Name</i>                                           | <i>Entrez Gene ID</i> |
|----------------------|--------------------|------------------------------------------------------------|-----------------------|
| 230424_at            | C5orf13            | Chromosome 5 open reading frame 13                         | 9315                  |
| 214188_at            | HEXIM1             | Hexamethylene bis-acetamide inducible 1                    | 10614                 |
| 224339_s_at          | ANGPTL1            | Angiopoetin-like 1                                         | 9068                  |
| 236442_at            | DPF3               | D4, zinc zinc double PHD fingers, family 5                 | 8110                  |
| 213789_at            | TBC1D25            | TBC1 domain family, member 25                              | 4943                  |
| 214954_at            | SUSD5              | Sushi domain containing 5                                  | 26032                 |
| 213493_at            | SNED1              | Sushi, nidogen and EGF-like domains                        | 25992                 |
| 214806_at            | BICD1              | Bicaudal D homolog 1 (Drosophila)                          | 636                   |
| 242851_at            | KIAA1919           | KIAA1919                                                   | 91749                 |
| 204262_s_at          | PSEN2              | Presenilin 2 (Alzheimer disease 4)                         | 5664                  |
| 234921_at            | ZNF470             | Zinc finger protein 470                                    | 388566                |
| 205214_at            | STK17B             | Serine/threonine kinase 17b                                | 9262                  |
| 204662_at            | CP110              | CP110 protein                                              | 9738                  |
| 206565_x_at          | SMA4               | Glucuronidase, beta pseudogene                             | 11039                 |
| 209053_s_at          | WHSC1              | Wolf-Hirschhorn syndrome candidate 1                       | 7468                  |
| 1558044_s_at         | EXOSC6             | Exosome component 6                                        | 118460                |
| 203881_s_at          | DMD                | Dystrophin (muscular dystrophy, Duchenne and Becker types) | 1756                  |
| 203441_s_at          | CDH2               | Cadherin 2, type 1, N-cadherin (neuronal)                  | 1000                  |
| 219773_at            | NOX4               | NADPH oxidase 4                                            | 50507                 |
| 219875_s_at          | PPPDE1             | PPPDE peptidase domain containing 1                        | 51029                 |
| 230872_s_at          | TTLL3              | Tubulin tyrosine ligase-like family, member 3              | 26140                 |
| 209068_at            | HNRPDL             | Heterogeneous nuclear ribonucleoprotein D-like             | 9987                  |
| 212776_s_at          | OBSL1              | Obscurin-like 1                                            | 23363                 |

Table E2c: Genes present in  $\leq 5$  asthmatic compared to  $\geq 1$  healthy controls

| <i>Affymetrix ID</i> | <i>Gene Symbol</i> | <i>Gene Name</i>                                                                | <i>Entrez Gene ID</i> |
|----------------------|--------------------|---------------------------------------------------------------------------------|-----------------------|
| 231923_at            | TMEM150C           | Transmembrane protein 150C                                                      | 441027                |
| 229412_at            | TAF8               | TAF8 RNA polymerase II, TATA box binding protein (TBP)-associated factor, 43kDa | 129685                |
| 228000_at            | ADC                | Arginine decarboxylase                                                          | 113451                |
| 210375_at            | PTGER3             | Prostaglandin E receptor 3 (subtype EP3)                                        | 5733                  |
| 215779_s_at          | HIST1H2BG          | Histone cluster 1, H2bg                                                         | 8339                  |
| 230054_at            | PRRT1              | Proline-rich transmembrane protein 1                                            | 80863                 |
| 229584_at            | LRRK2              | Luciferin-rich repeat kinase 2                                                  | 120892                |
| 203661_s_at          | TMOD1              | Tropomodulin 1                                                                  | 7111                  |
| 213303_x_at          | ZBTB7A             | Zinc finger and BTB domain containing 7A                                        | 51341                 |
| 209829_at            | C6orf32            | Chromosome 6 open reading frame 32                                              | 9750                  |
| 204385_at            | KYNU               | Kynureninase (L-kynurenine hydrolase)                                           | 8942                  |
