# Supplementary material
Source: PubMed Central journal article supplement (PMC3402550)

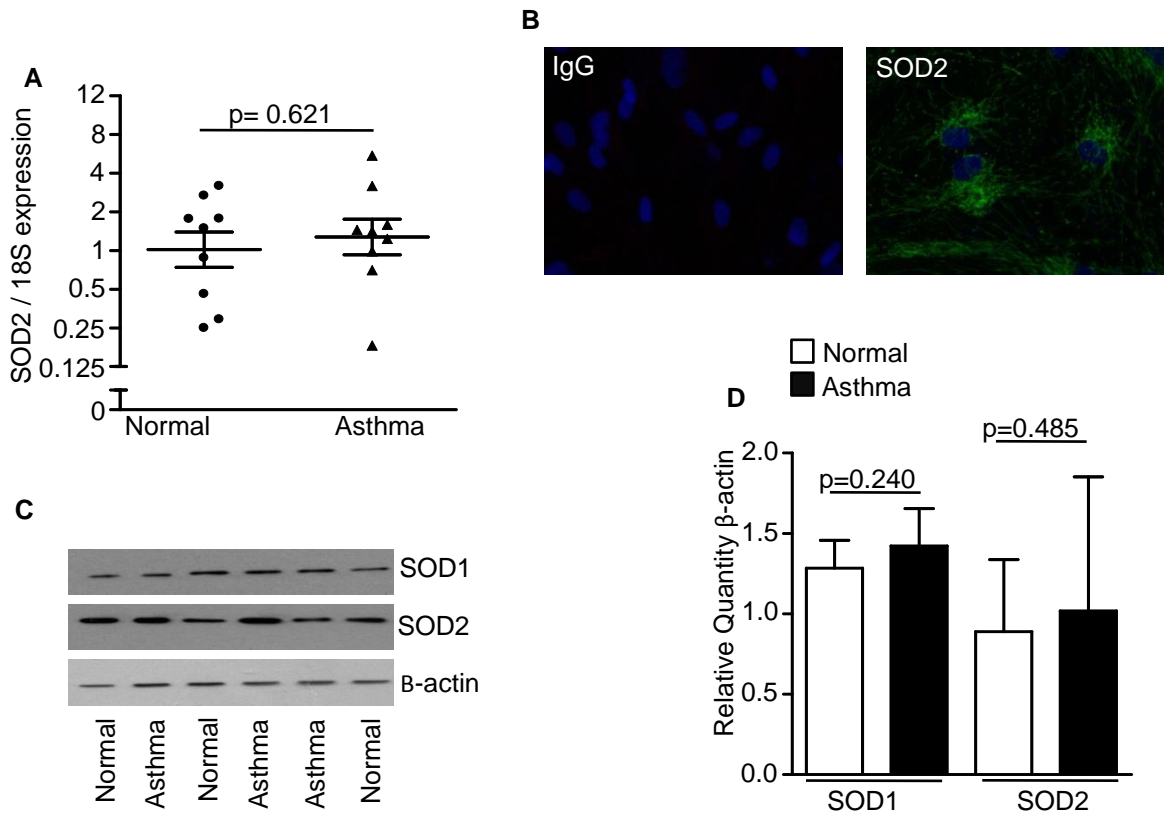

Figure E1

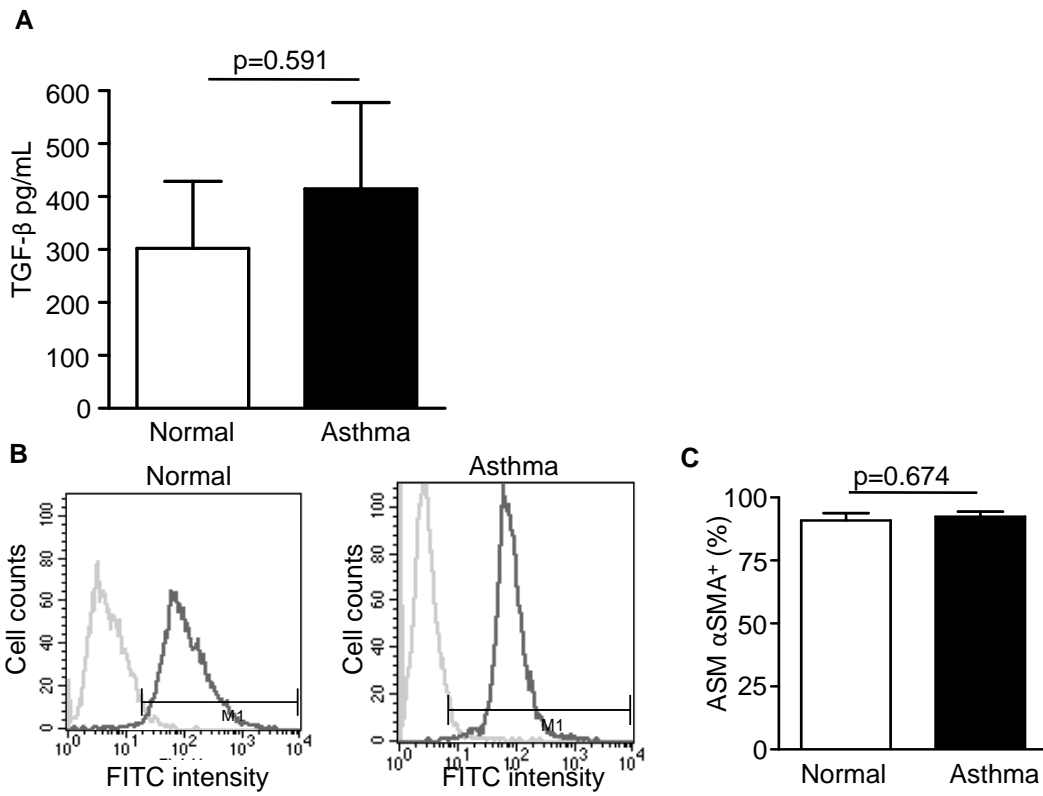

Figure E2

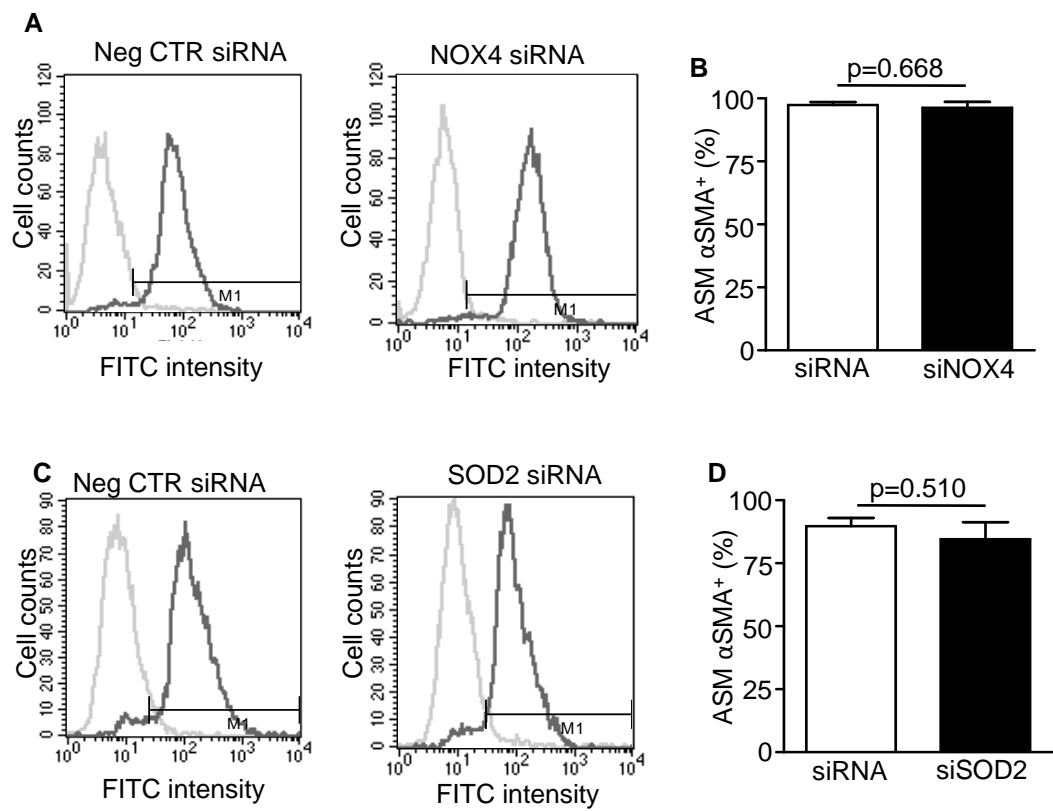

Figure E3

Supplement: supp_185.3.267_Sutcliffe_ODS_fig_E1-E3.pdf [file supp_185.3.267_Sutcliffe_ODS_fig_E1-E3.pdf]
